# Supplementary material for: SRC family kinase (SFK) inhibitor dasatinib improves the antitumor activity of anti-PD-1 in NSCLC models by inhibiting Treg cell conversion and proliferation
Source: PubMed Central journal article supplement — J Immunother Cancer. 2021 Mar 3;9(3):e001496. doi: 10.1136/jitc-2020-001496 (PMC7931761; doi:10.1136/jitc-2020-001496), 2021-03-03
Supplement: jitc-2020-001496supp001.pdf [file jitc-2020-001496supp001.pdf]

**Supplementary Table 1.** Cohort of NSCLC patients from Clinica Universidad de Navarra (n=116) used to study the expression of YES1, PDL1, FOXP3, CD4, CD8, CD31 and F4/80 without neo- or adjuvant chemo- or radiotherapy. Three patients were not evaluated due to technical issues.

**Clinica Universidad de Navarra Cohort (n=116)**

|                         |              |
|-------------------------|--------------|
| <b>Age (years)</b>      | <b>n (%)</b> |
| ≤65                     | 61 (53)      |
| <65                     | 55 (47)      |
| <b>Gender</b>           |              |
| Female                  | 22 (19)      |
| Male                    | 94 (81)      |
| <b>Stage</b>            |              |
| I                       | 107 (92)     |
| II                      | 6 (5)        |
| III                     | 3 (3)        |
| <b>Histology</b>        |              |
| Adenocarcinoma          | 55 (47)      |
| Squamous cell carcinoma | 49 (42)      |
| Other                   | 12 (11)      |
| <b>Smoking status</b>   |              |
| Non-smoker              | 10 (9)       |
| Former smoker           | 79 (68)      |
| Current smoker          | 27 (23)      |

**Supplementary Table 2.** Antibodies and conditions used for multispectral immunophenotyping in mouse 393P tumors and NSCLC patients.

| <b>Antibody (Ref)</b>   | <b>Dilution</b> | <b>Antigen retrieval</b> | <b>Opal /Dilution</b> |
|-------------------------|-----------------|--------------------------|-----------------------|
| Foxp3 (CST, 12653)      | 1:600           | Citrate buffer, pH6      | 540 / 1:500           |
| CK (CST, 4279)          | 1:100           | TrisEDTA buffer, pH9     | 690 / 1:100           |
| CD31 (CST, 77699)       | 1:400           | Citrate buffer, pH6      | 570 / 1:600           |
| CD4 (CST, 25229)        | 1:400           | Citrate buffer, pH6      | 520 / 1:300           |
| CD8 (CST, 98941)        | 1:500           | Citrate buffer, pH6      | 620 / 1:100           |
| F4/80 (CST, 70076)      | 1:400           | Citrate buffer, pH6      | 650/1:600             |
| CD8 (Thermo, C8/14bb)   | 1:400           | PerkinElmer reagent, pH6 | 570                   |
| CD4(Dako, 4B12)         | Ready to use    | Dako reagent, pH9        | 650                   |
| FOXP3 (PE, OP7TL1001KT) | 1:300           | PerkinElmer reagent, pH6 | 620                   |

**Supplementary Table 3.** Sequences of the primers employed for RT-qPCR analysis.

| <b>Gene</b> | <b>Forward sequence (5'→3')</b> | <b>Reverse sequence (5'→3')</b> |
|-------------|---------------------------------|---------------------------------|
| GAPDH       | ACTTTGTCAAGCTCATTTC             | TGCAGCGAACTTTATTGATG            |
| YES1        | GTAAGCCCAAGTGCCAGTCATT          | GGAAGAGGTCGGGGCAACT             |
| SRC         | AGGCTTCAACTCCTCGGAC             | CTCATAGTCATAGAGGGCCACA          |
| FYN         | GGGTGTGAACTCCTCCTCTC            | TCCGTCCGTGCTTCATAGT             |
| LYN         | TGTGAGAGATCCAACGTCCA            | TGTTTTGAAATCTCTGTCCTGGT         |
| IL10        | GGACAACATACTGCTAACCG            | AATCACTCTTCACCTGCTCC            |

**Supplementary Table 4.** Antibodies and conditions used for Western blot analysis.

| <b>Antibody (anti-) (Ref)</b> | <b>Dilution</b> | <b>Manufacturer</b> |
|-------------------------------|-----------------|---------------------|
| YES1 (PA5-72233)              | 1:2000          | ThermoFisher        |
| pSFKs/pLCK (D49G4)            | 1:1000          | Cell Signaling      |
| β actin                       | 1:10000         | Sigma               |
| pSTAT3 (Y705) (#9131)         | 1:1000          | Cell Signaling      |
| STAT3 (#9139)                 | 1:1000          | Cell Signaling      |
| pMAPK (#9101)                 | 1:1000          | Cell Signaling      |
| MAPK (#9102)                  | 1:1000          | Cell Signaling      |
| pAKT (#4060)                  | 1:1000          | Cell Signaling      |
| AKT (#9272)                   | 1:1000          | Cell Signaling      |
| pSMAD3 (#8769)                | 1:1000          | Cell Signaling      |
| SMAD3 (#5678)                 | 1:1000          | Cell Signaling      |
| LCK (#2752)                   | 1:1000          | Cell Signaling      |
| pSTAT5 (#4322)                | 1:1000          | Cell Signaling      |
| STAT5 (#9420)                 | 1:1000          | Cell Signaling      |

**Supplementary Table 5.** Antibodies and conditions used for the immunophenotyping of 393P tumors by flow cytometry.

| <b>Antibody (anti-)</b> | <b>Dilution</b> | <b>Clone</b> | <b>Manufacturer</b> |
|-------------------------|-----------------|--------------|---------------------|
| CD45                    | 1:1000          | 30-F11       | BioLegend           |
| CD8a                    | 1:400           | 53-6.7       | BioLegend           |
| CD4                     | 1:800           | RM4-5        | BioLegend           |
| CD19c                   | 1:400           | 6D5          | BioLegend           |
| NK1.1                   | 1:20            | PK136        | BioLegend           |

---

|       |       |          |           |
|-------|-------|----------|-----------|
| CD25  | 1:100 | PC61     | BioLegend |
| F4/80 | 1:200 | BM8      | BioLegend |
| CD11b | 1:400 | M1/70    | BioLegend |
| Ly6C  | 1:400 | HK1.4    | BioLegend |
| Ly6G  | 1:400 | 1A8      | BioLegend |
| LAG3  | 1:200 | C9B7W    | BioLegend |
| PD-1  | 1:160 | 29F.1A12 | BioLegend |
| GITR  | 1:200 | DTA-1    | BioLegend |
| PDL1  | 1:80  | 10F.9G2  | BioLegend |
| FOXP3 | 1:160 | 3G3      | Abcam     |

---
