# Supplementary figures and images for: SRC family kinase (SFK) inhibitor dasatinib improves the antitumor activity of anti-PD-1 in NSCLC models by inhibiting Treg cell conversion and proliferation
Source: PubMed Central journal article supplement — J Immunother Cancer. 2021 Mar 3;9(3):e001496. doi: 10.1136/jitc-2020-001496 (PMC7931761; doi:10.1136/jitc-2020-001496), 2021-03-03

Supplementary Figure 1. Redin et al., 2020

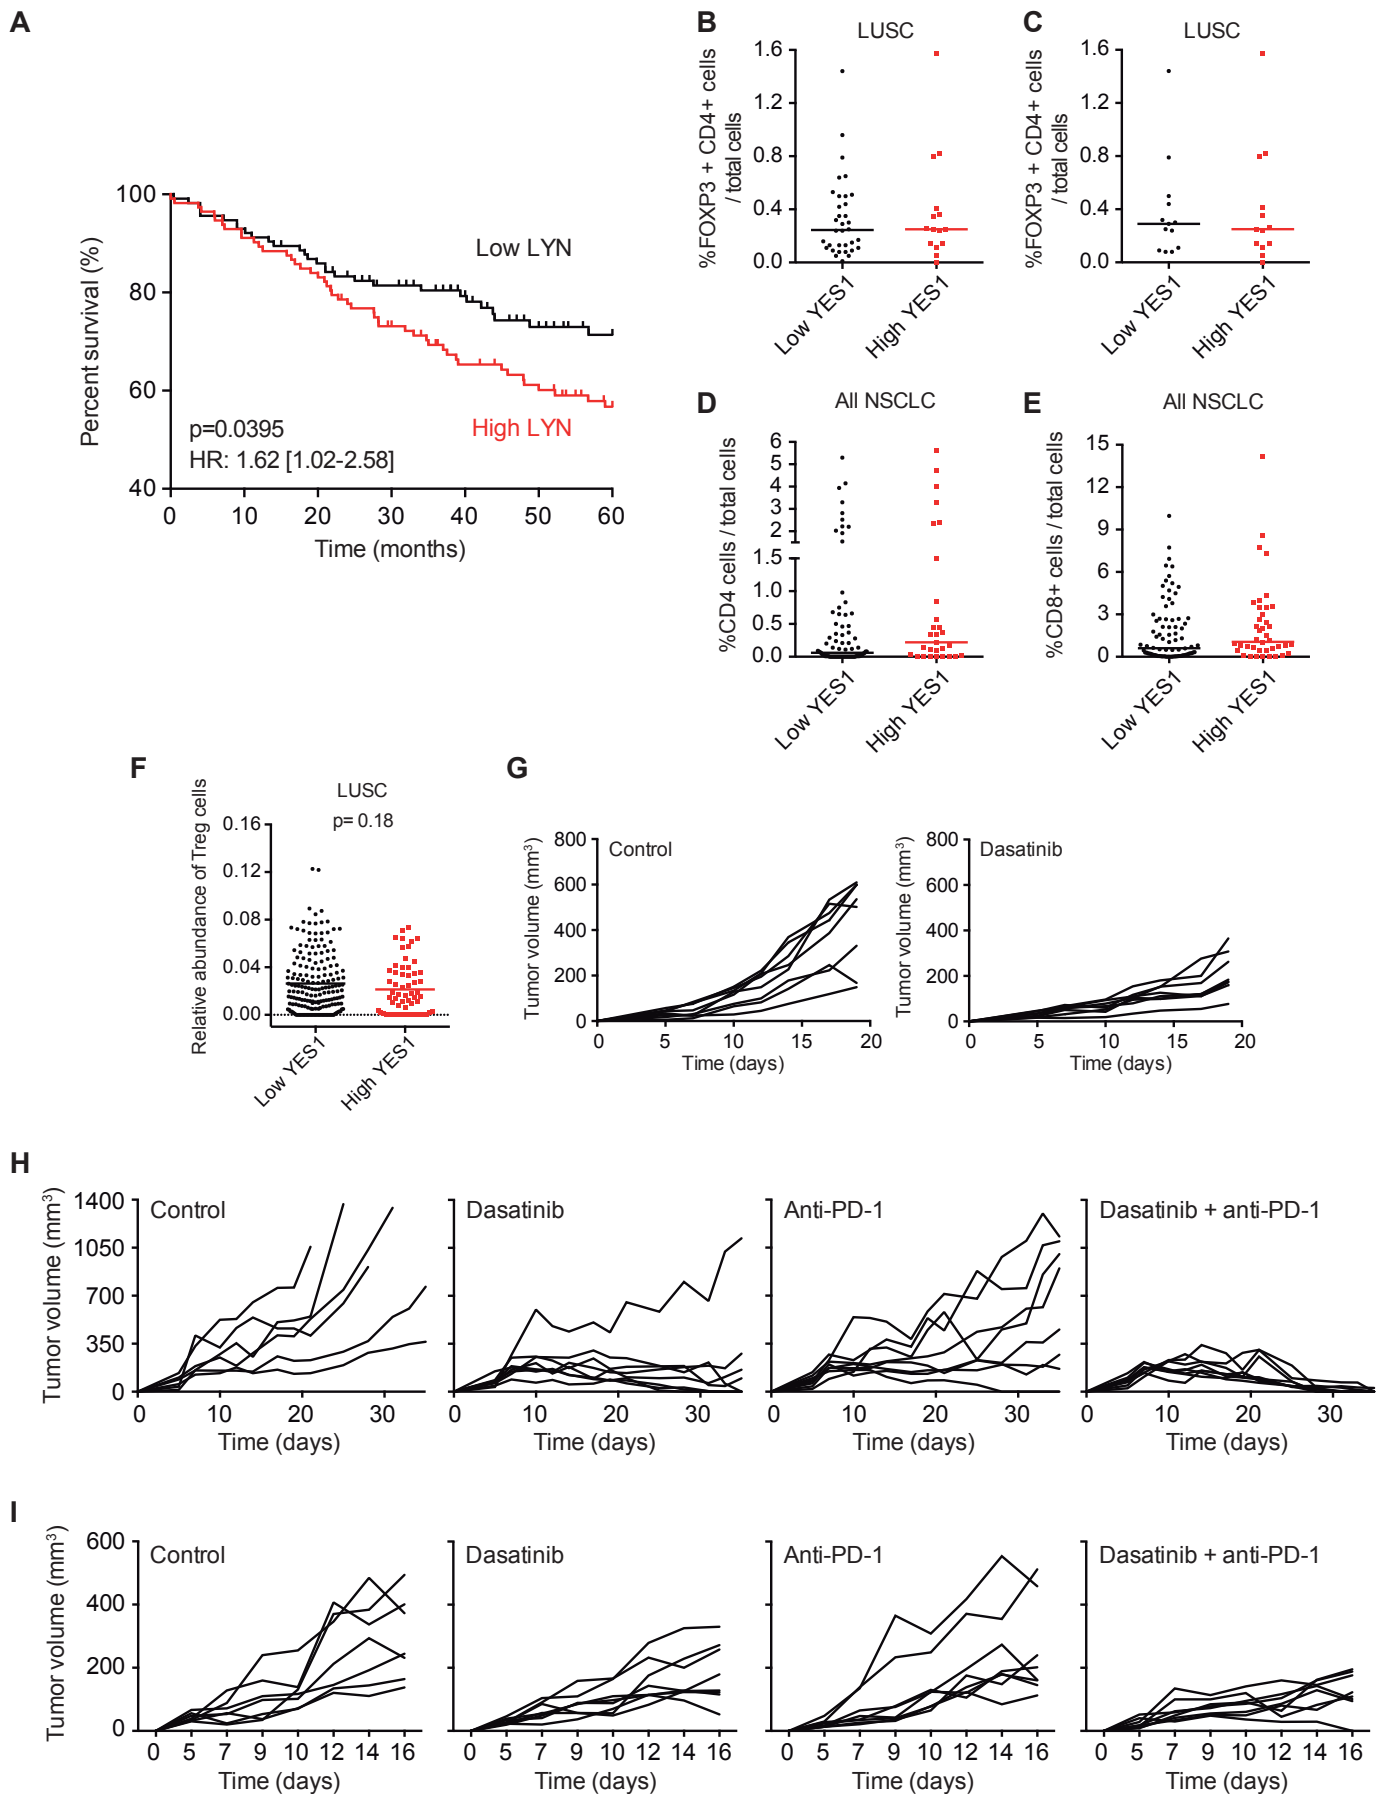

Supplement: jitc-2020-001496supp004.pdf [file jitc-2020-001496supp004.pdf]

## Supplementary Figure 2. Redin et al., 2020

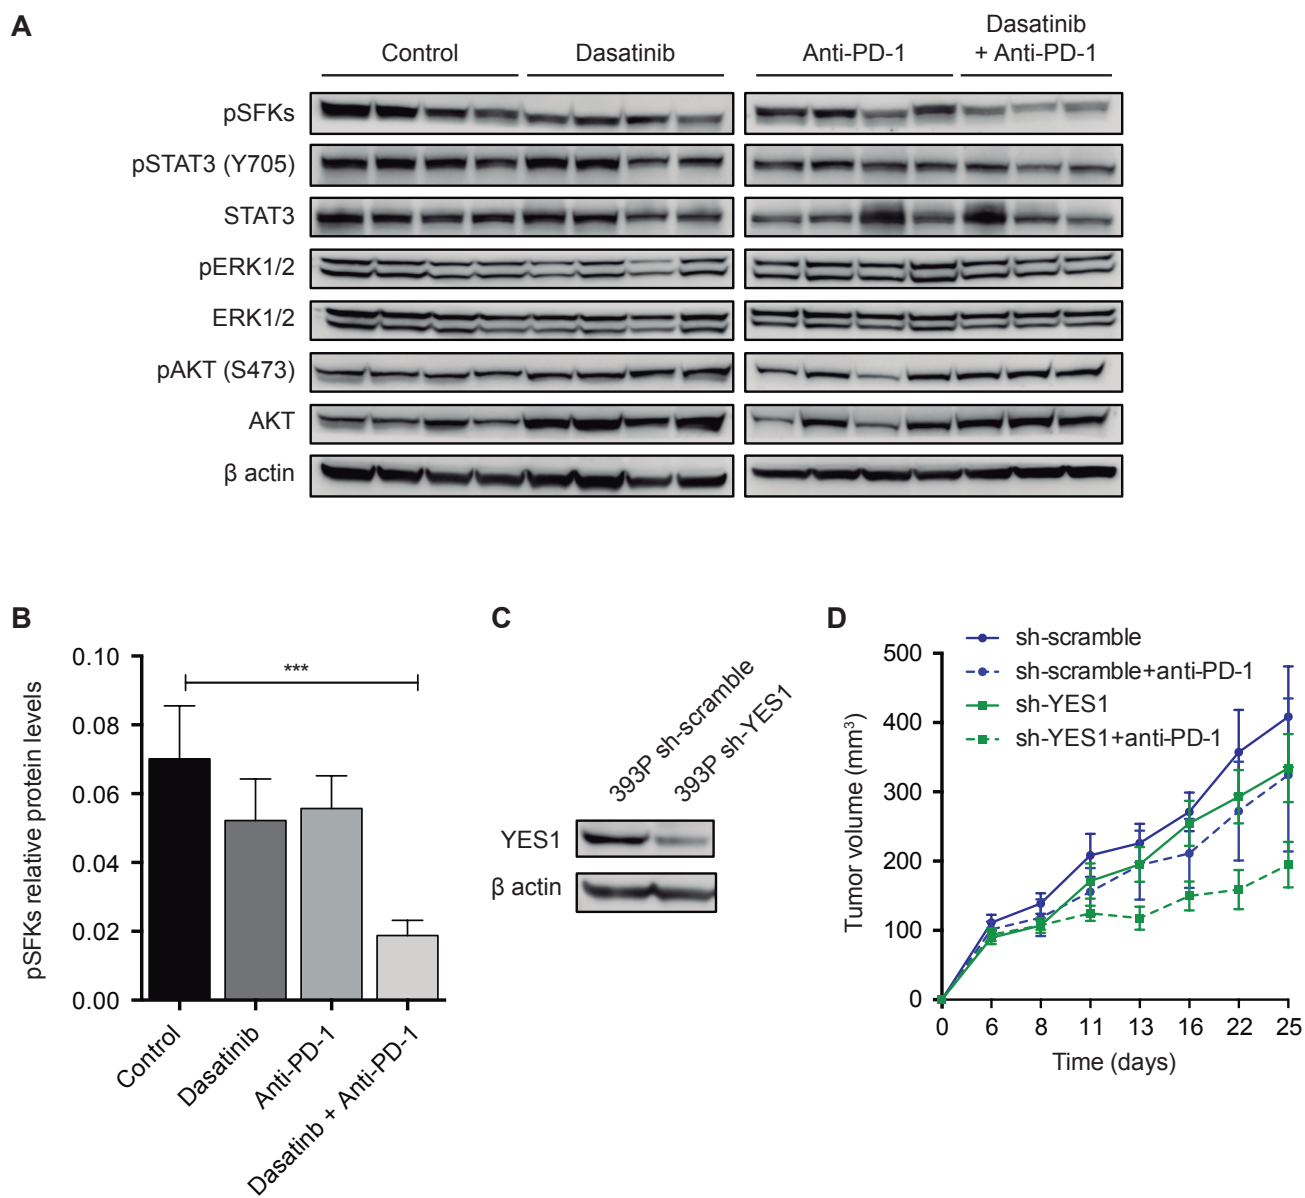

Supplement: jitc-2020-001496supp005.pdf [file jitc-2020-001496supp005.pdf]

Supplementary Figure 3. Redin et al., 2020

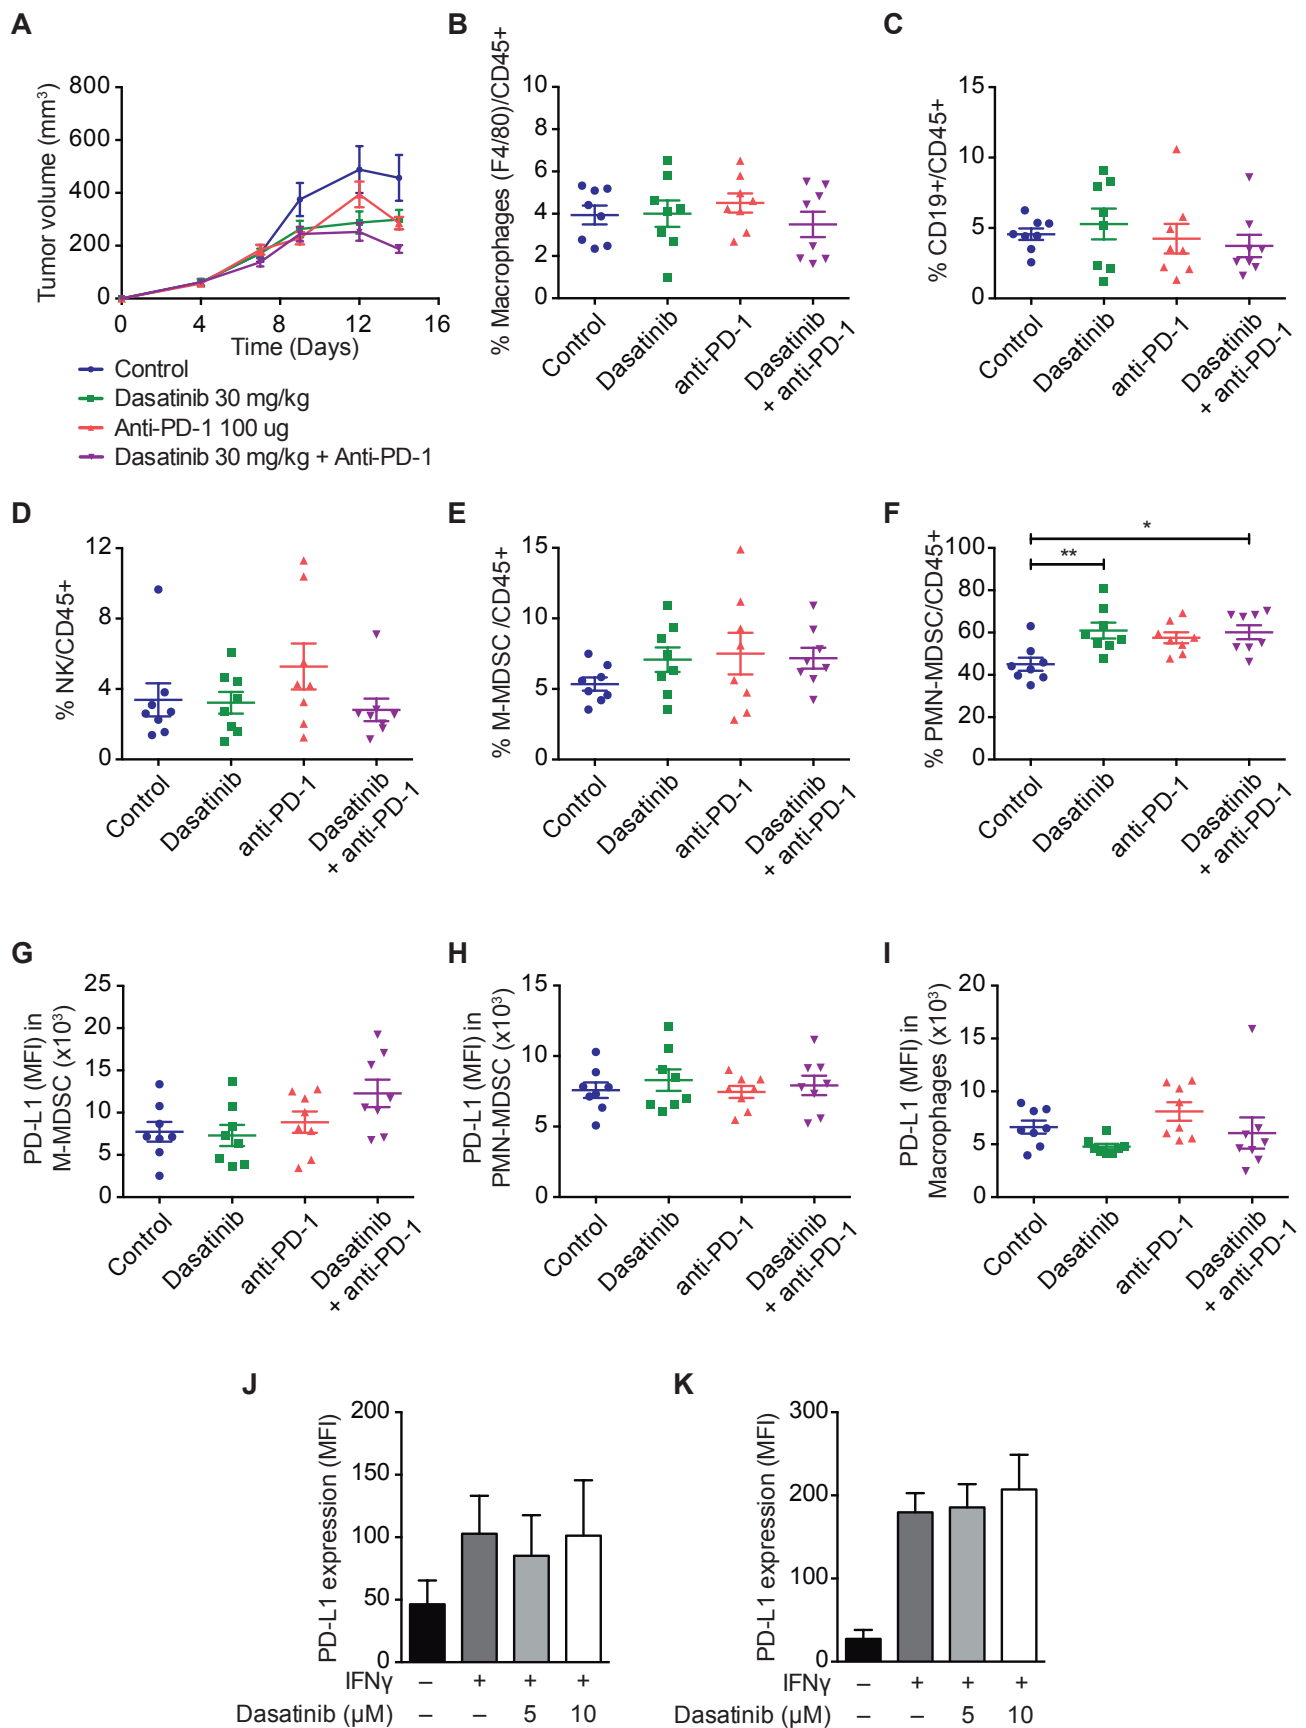

Supplement: jitc-2020-001496supp006.pdf [file jitc-2020-001496supp006.pdf]

Supplementary Figure 4. Redin et al., 2020

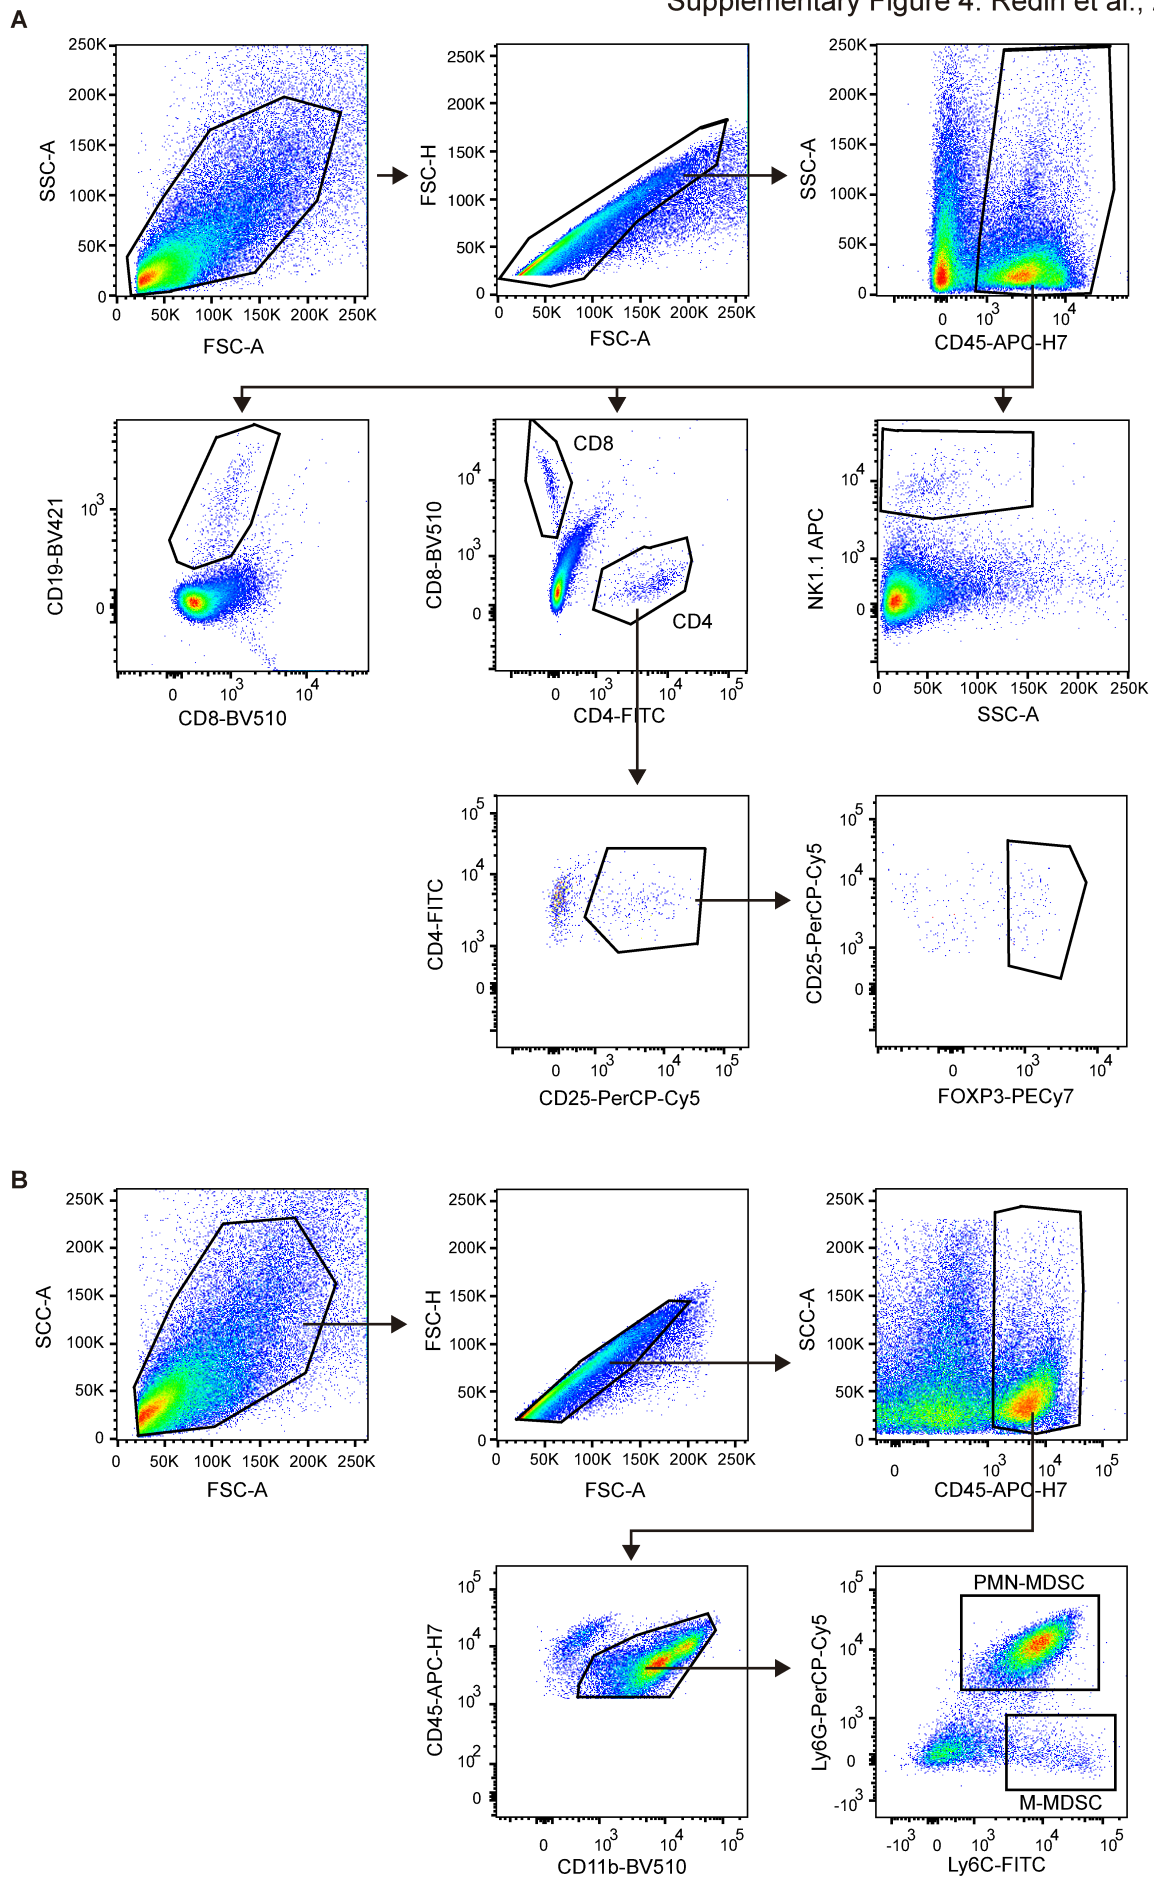

Supplement: jitc-2020-001496supp007.pdf [file jitc-2020-001496supp007.pdf]

Supplementary Figure 5. Redin et al., 2020

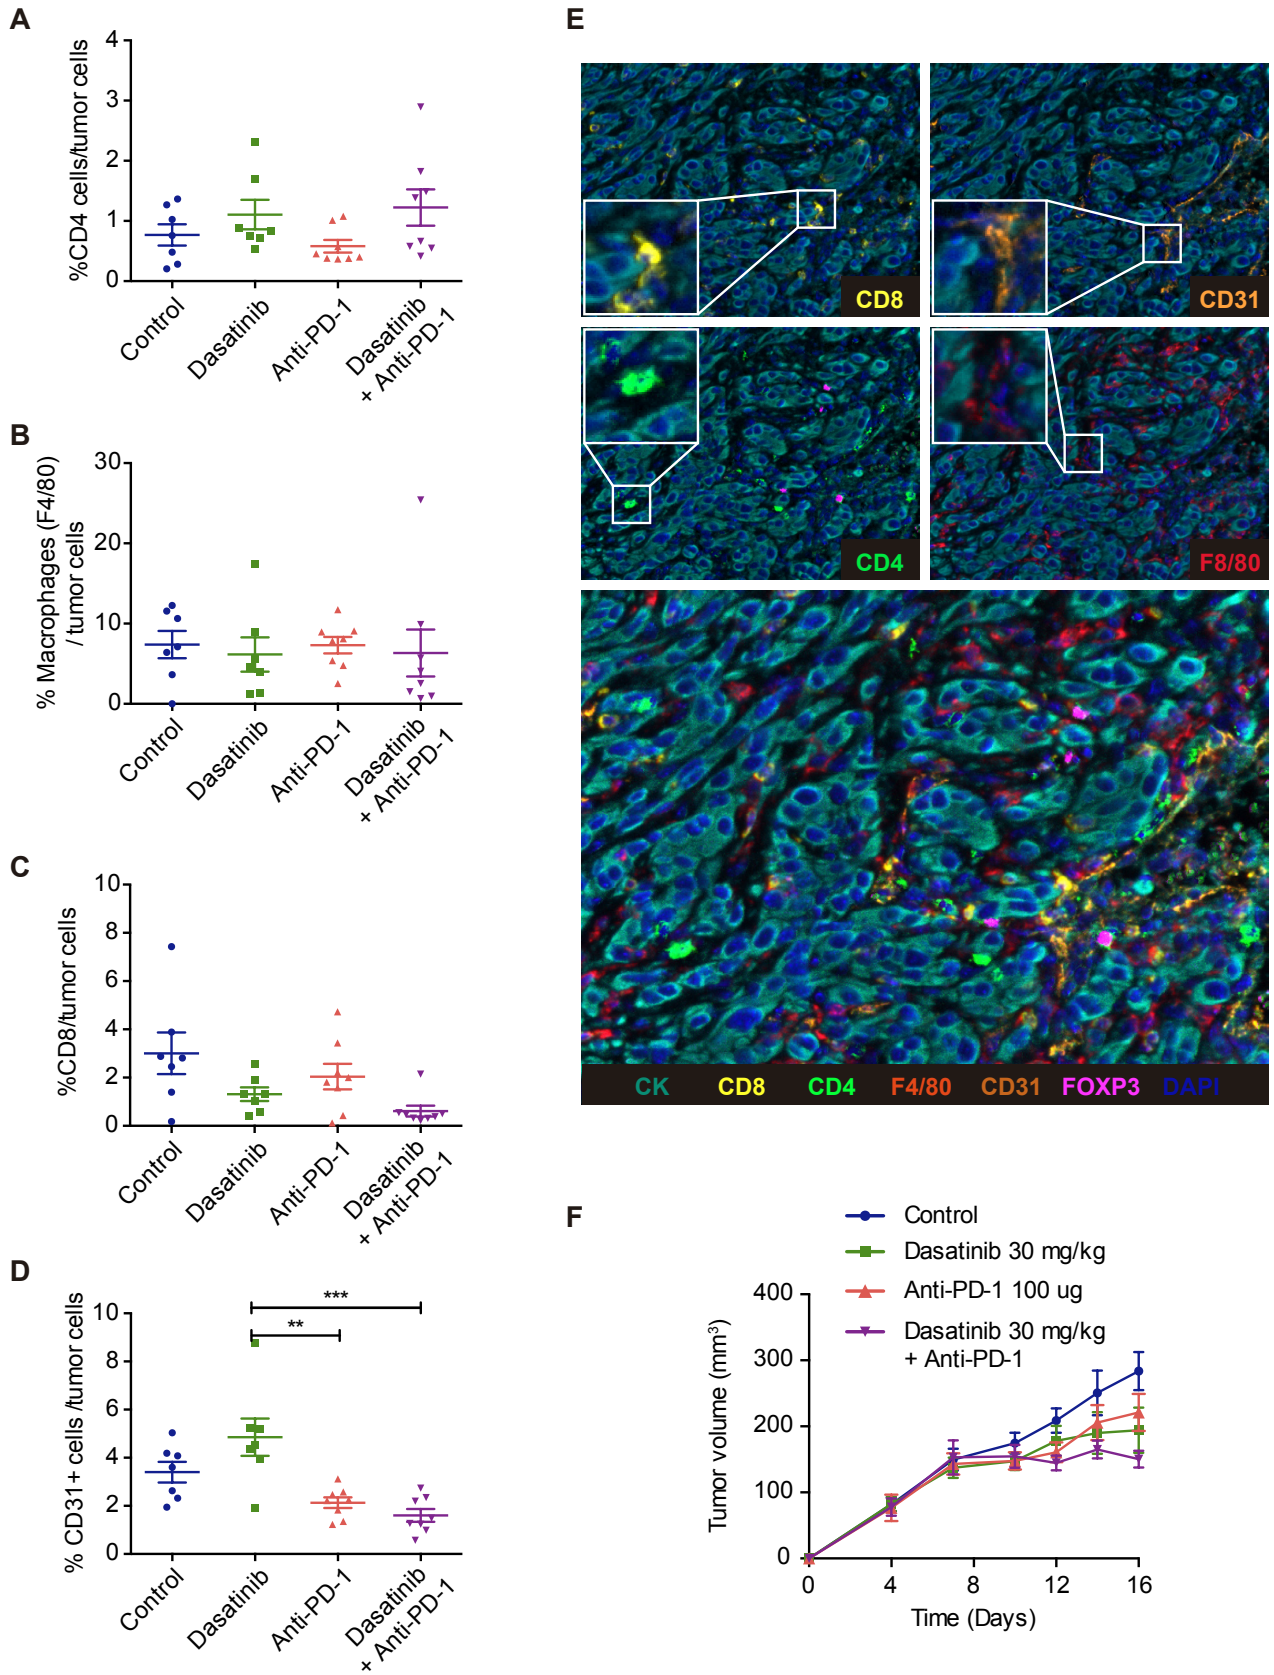

Supplement: jitc-2020-001496supp008.pdf [file jitc-2020-001496supp008.pdf]

Supplementary 6. Redin et al., 2020

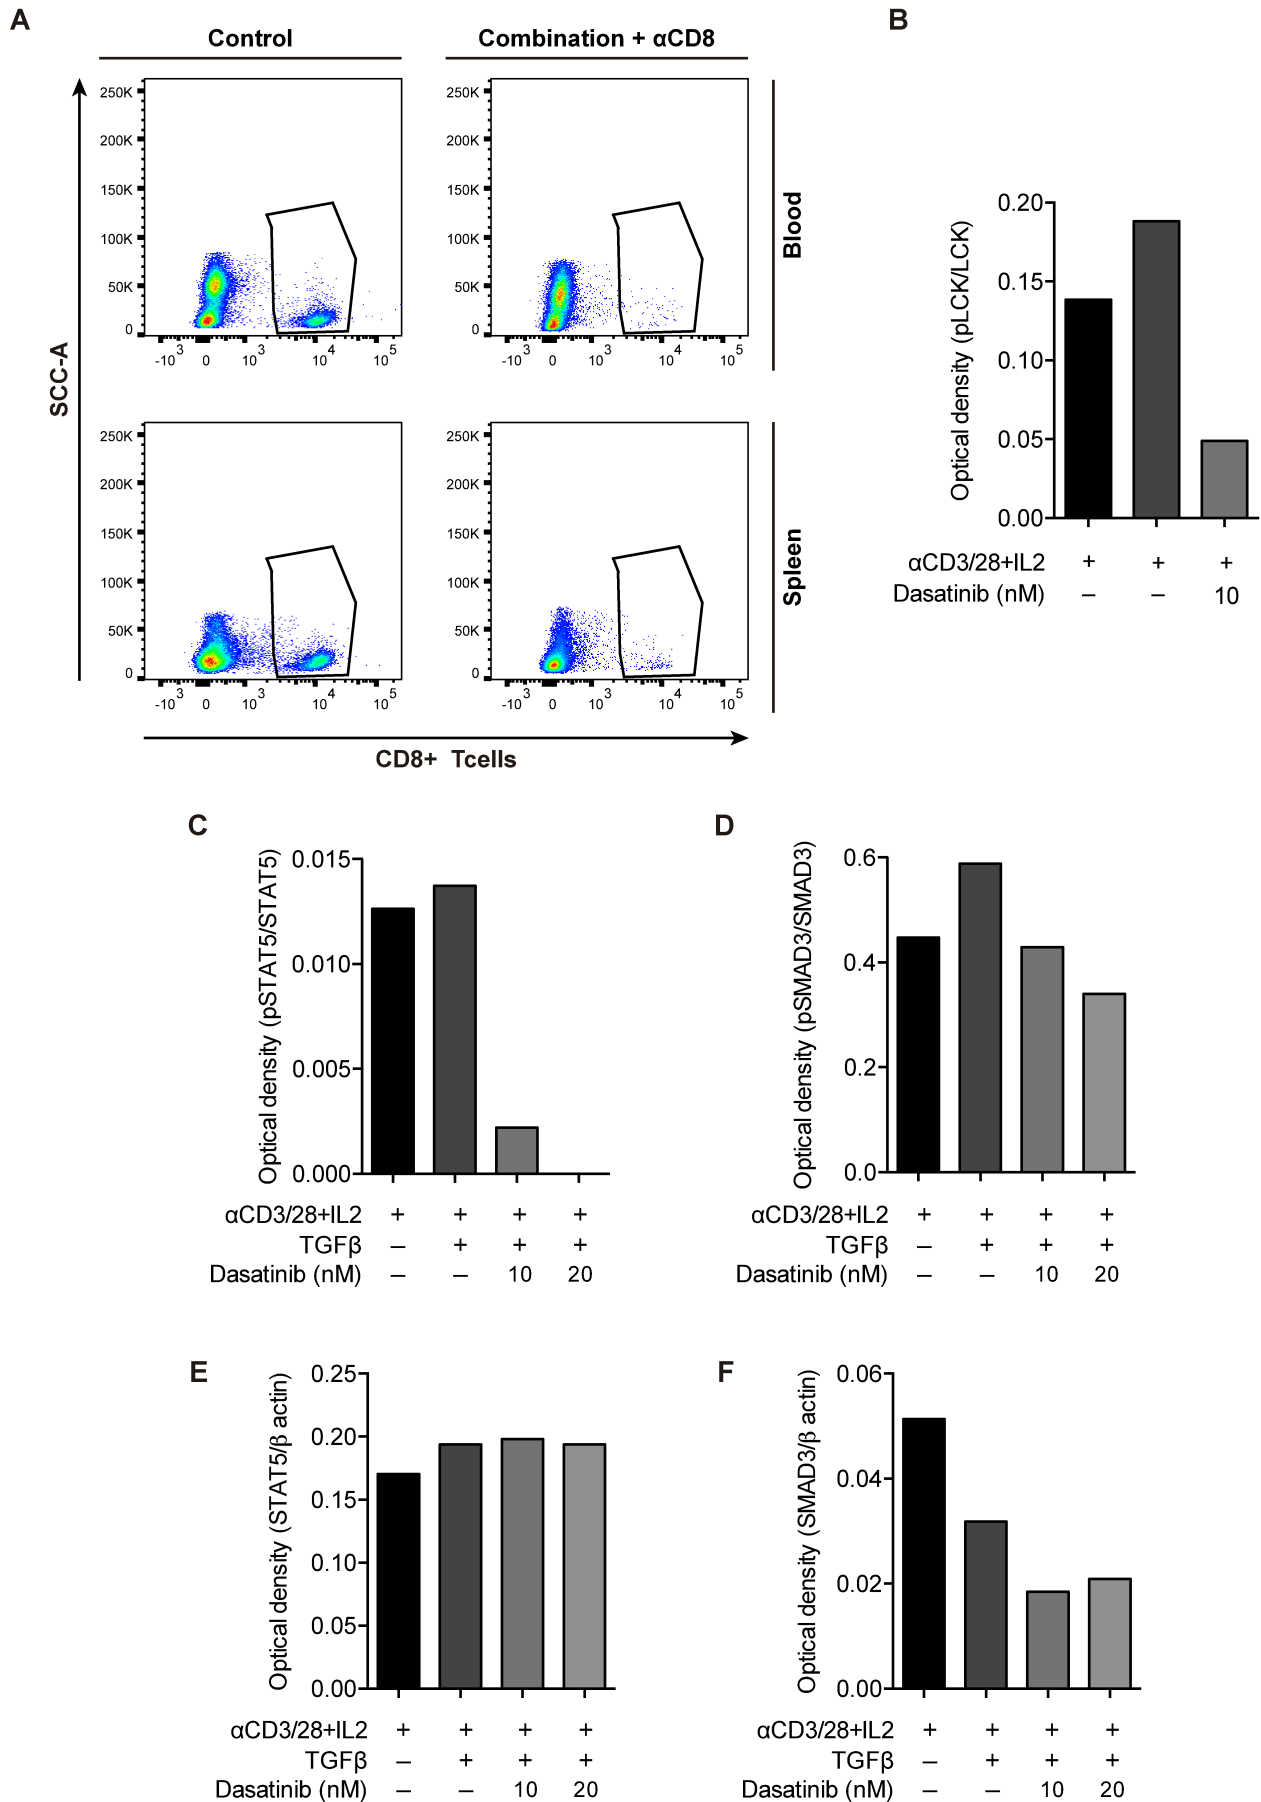

Supplement: jitc-2020-001496supp009.pdf [file jitc-2020-001496supp009.pdf]
